# In the absence of BYPASS1-related gene function, the *bps* signal disrupts embryogenesis by an auxin-independent mechanism

Dong-Keun Lee<sup>1</sup>, Jaimie M. Van Norman<sup>2</sup>, Caroline Murphy<sup>1</sup>, Emma Adhikari<sup>1</sup>, Jason W. Reed<sup>3</sup> and Leslie E. Sieburth<sup>1,\*</sup>

## SUMMARY

Development is often coordinated by biologically active mobile compounds that move between cells or organs. *Arabidopsis* mutants with defects in the *BYPASS1* (*BPS1*) gene overproduce an active mobile compound that moves from the root to the shoot and inhibits growth. Here, we describe two related *Arabidopsis* genes, *BPS2* and *BPS3*. Analyses of single, double and triple mutants revealed that all three genes regulate production of the same mobile compound, the *bps* signal, with *BPS1* having the largest role. The triple mutant had a severe embryo defect, including the failure to properly establish provascular tissue, the shoot meristem and the root meristem. Aberrant expression of *PINFORMED1*, *DR5*, *PLETHORA1*, *PLETHORA2* and *WUSCHEL-LIKE HOMEODOMAIN* were found in heart-stage *bps* triple-mutant embryos. However, auxin-induced gene expression, and localization of the PIN1 auxin efflux transporter, were intact in *bps1* mutants, suggesting that the primary target of the *bps* signal is independent of auxin response. Thus, the *bps* signal identifies a novel signaling pathway that regulates patterning and growth in parallel with auxin signaling, in multiple tissues and at multiple developmental stages.

**KEY WORDS:** Long-distance signaling, Embryogenesis, Vascular meristem

## INTRODUCTION

Coordination of development among distinct cell types is an underlying requirement for multicellular organisms. Numerous hormone and peptide signals are used in plants both at long-range and more locally to regulate patterning and growth of different organs. Identification of additional mobile signaling molecules is expected to elucidate further the fundamental aspects of plant development (Van Norman et al., 2011a). A putative long-distance signal was uncovered by the analysis of the *Arabidopsis* *bypass1* (*bps1*) mutant. This mutant shows severe shoot growth arrest and abnormal root development, phenotypes that arise due to overproduction of a mobile compound (Van Norman et al., 2004). In *bps1* mutants, this compound is synthesized in the root, and it moves to the shoot, where it is sufficient to arrest development.

The developmental defects in *bps1* roots appear to be caused by the same mobile compound as the shoot defects. This connection was established from studies of *bps1* mutants grown on media containing inhibitors of carotenoid biosynthesis, fluridone and 2-(4-chlorophenylthio)-triethylamine hydrochloride (CPTA). Treatment with these compounds results in albino phenotypes, which strongly reduce growth in normal plants. However, the same treatment partially rescues both the root and the shoot defects of *bps1* mutants (Van Norman et al., 2004). Although carotenoids are required for synthesis of the mobile compound, genetic analysis revealed that the mobile compound was distinct from the known

carotenoid-derived signaling molecules, abscisic acid and strigolactones (Van Norman and Sieburth, 2007). Here, we refer to this unidentified mobile compound as the *bypass* (*bps*) signal.

Arguably the best-known plant mobile signaling molecule is auxin. Developmental roles of auxin include establishment of the embryonic apical-basal axis, root establishment, vascular patterning, gravitropic responses and organogenesis (Jenik et al., 2005; Benjamins and Scheres, 2008; Nawy et al., 2008). Normal embryogenesis requires auxin production, as revealed by mutant combinations deficient in members of the YUCCA auxin biosynthetic enzymes, which show embryonic defects in root and cotyledon formation, and in the patterning of internal tissues (Cheng et al., 2007). Transport of auxin is also essential, as embryos with chemically induced or genetic defects in auxin transport have defects in apical/basal polarity, and root and cotyledon formation (Hadfi et al., 1998; Friml et al., 2003; Weijers et al., 2005; Mravec et al., 2008). Cellular responses to auxin include changes in transcription, and mutants with defects in auxin-responsive transcription factors display a similar range of embryo development defects (Hardtke and Berleth, 1998; Long et al., 2006; Weijers et al., 2006). Auxin transport is, in turn, under regulation by Class III homeodomain-leucine zipper (HD-ZIP III) and KANADI (KAN) activities (Ilegems et al., 2010).

Other plant hormones and signaling molecules can modulate auxin-signaling processes (Wolters and Jürgens, 2009). Interaction between auxin and the plant hormone cytokinin is crucial for establishment of the root stem cell niche in the *Arabidopsis* embryo (Müller and Sheen, 2008), and cytokinins can also affect PIN auxin transporter abundance (Marhavy et al., 2011; Zhang et al., 2011). Strigolactone also influences auxin transport, thereby modulating lateral organ outgrowth (Crawford et al., 2010; Domagalska and Leyser, 2011). The *bps* signal might be an additional molecule that affects auxin response and/or transport, as shoots of *bps1* mutants,

<sup>1</sup>Department of Biology, University of Utah, Salt Lake City, UT 94112, USA. <sup>2</sup>Biology Department, Duke University, Durham, NC 27708, USA. <sup>3</sup>Department of Biology, University of North Carolina at Chapel Hill, Chapel Hill, NC 27599, USA.

\* Author for correspondence (sieburth@biology.utah.edu)

treated with a synthetic auxin, 2,4-D, are unable to induce expression of the auxin-responsive reporter DR5::GUS (Van Norman et al., 2004). Although this result implicated auxin signaling as a potential target of the *bps* signaling pathway, direct evidence linking the *bps* signal to auxin pathways is lacking.

The *bps1* mutant phenotype is evident upon germination, particularly in the emerging root, and experiments involving genetic manipulation of root development revealed that the signaling pathway is also effective in older seedlings (Van Norman et al., 2011b). However, its possible function at other developmental stages has not been addressed. The *BPS1* gene is conserved in plant genomes, but no function can be deduced by its amino acid sequence. The *Arabidopsis* genome encodes two genes highly similar to *BPS1*, which we call *BPS2* and *BPS3*. Here, functional analysis of the *BPS* gene family uncovered a role for the *bps* signal in embryo patterning. Use of molecular markers during embryogenesis, and auxin-focused experiments with the *bps1* single mutant suggest that auxin signaling is intact in *bps* mutants, and that the *bps* signal interferes with a developmental process common to embryogenesis, seedlings and late vegetative development.

## MATERIALS AND METHODS

### Plant materials

The *bps1-1* and *bps1-2* alleles have been described previously (Van Norman et al., 2004). Details on the *bps2* and *bps3* alleles and genotyping are in supplementary material Tables S1 and S2 (McCallum et al., 2000a; McCallum et al., 2000b; Till et al., 2003; Henikoff et al., 2004). Double and triple *bps* mutants used the *bps1-2*, *bps2-2* and *bps3-2* alleles (all Col background). Repeat analyses with independently generated double and triple mutants, and different seed batches, gave identical results. Auxin analyses used *axr1-3* (Leyser et al., 1993) and *rtx-1* (Boerjan et al., 1995). Molecular markers included *pPIN1::PIN1-GFP* (Heisler et al., 2005), *DR5(rev)::GFP* (Friml et al., 2003), *pWOX5::NLS-vYFP<sub>3</sub>* and *WOX8gΔ::NLS-vYFP<sub>3</sub>* (Breuninger et al., 2008), *pPLT1::CFP* and *pPLT2::CFP* (Galinha et al., 2007). Analyses were carried out on the self-pollinated progeny of *BPS1<sup>+</sup>/bps1<sup>-</sup> bps2<sup>-</sup> bps3<sup>-</sup>* [Marker<sup>+/+</sup>].

### Growth conditions

Plants were grown as previously described (Van Norman et al., 2004), and seedling phenotypes analyzed at either 9 days post-imbibition (dpi) (22°C) or 11 dpi (16°C). Growth media were supplemented with the auxin NAA (1 or 100 μM) or NPA (5 μM) at 22°C.

### BYPASS gene family

An unrooted phylogenetic tree was based on predicted amino acid sequence identified using BLAST on the TAIR web site and constructed using phylogeny.fr, using the 'A la Carte' mode (Dereeper et al., 2008).

### Expression analysis

Q-RT PCR used three biological and two technical replicates, and *ACT2* as an internal reference (Zhang et al., 2010). Auxin-induced gene expression experiments used 4-day-old seedlings treated with 10 μM 2,4-D for 6 hours. Primer sequences are provided in supplementary material Table S2. Whole-mount in situ hybridization of *BPS1* was performed as described (Hejático et al., 2006) and used a *BPS1*-specific probe corresponding to the 3' region of the gene. Figures show representative data more from than 10 embryos for each stage, and negative controls with a *BPS1* sense probe.

### Microscopy

Developing seeds were mounted in 70% chloral hydrate solution, 4% glycerol and examined with differential interference contrast optics on Olympus BX50 microscope. Normal sibling embryos served as an internal standard to stage embryos. Fluorescence (GFP, YFP and CFP) was visualized using a Zeiss 510 Meta laser-scanning confocal microscope and an Olympus BX50 microscope. Analysis of PIN1-GFP trafficking was conducted on 3 dpi seedlings following methods previously described (Geldner et al., 2001; Sieburth et al., 2006).

### FL and CPTA treatment

Carotenoid biosynthesis inhibitors [CPTA (2-(4-chlorophenylthio)-triethylamine hydrochloride) or Fluridone (FL) (Sigma)] were applied to siliques of soil-grown plants (*bps1-2<sup>-</sup> bps2-2<sup>-</sup> bps3-2<sup>-</sup>* and wild-type). The primary inflorescence stem was removed, and three axillary inflorescence stems of each experimental plant were marked for different treatments (100 μM FL, 5 mM CPTA or with 10% ethanol as control). Cotton-tipped applicators were used to applying the inhibitor (or control) to the outside of each silique daily. Treatments began 2 days after pollination, and continued daily until age-matched controls were starting to turn brown. Silique color was monitored to determine the effectiveness of FL and CPTA treatment; photobleaching occurred within 2 days of initiating treatment. Seeds from treated siliques were germinated on agar plates at 22°C and analyzed at 9 dpi.

## RESULTS

### BYPASS gene family

*bypass1* (*bps1*) mutants show a severe growth defect that resulted from a non-cell-autonomous signal generated within the mutant root (Van Norman et al., 2004; Van Norman et al., 2011b). Although *BPS1* was only required in the root, *BPS1* mRNA was detected in other organs, suggesting that *BPS1* might have additional functions that are masked by redundant gene activities. Indeed, the *Arabidopsis* genome contains two additional *BYPASS* (*BPS*) genes, *BPS2* and *BPS3* (Fig. 1A-B; see supplementary material Table S4). In roots, shoots and siliques, *BPS1* was expressed at the highest level of these three genes, whereas *BPS3* expression was almost undetectable (Fig. 1C). Expression of all three genes was highest in siliques, suggesting that *BYPASS* function might be particularly important during embryogenesis.

We analyzed embryonic expression of *BPS1* by whole-mount in situ hybridization (Fig. 1D-J). Strong expression was found in the central hypocotyl (cortex, endodermis and vascular) tissues in both torpedo-stage (Fig. 1D-F) and mature embryos (Fig. 1H-J), but we found no expression in the epidermis. There was very low expression in the shoot apical meristem (SAM) and the root stem cell region, despite these tissues showing the most severe defects in *bps1* mutants (Van Norman et al., 2004). The lack of *BPS1* expression in these tissues is consistent with *bps1* phenotypes arising from a non-cell-autonomous signal, and the presence of *BPS1* RNA in cortex, endodermis and vascular tissues suggests that these tissues could all serve as locations for *bps1* signal synthesis.

### BPS1, BPS2 and BPS3 carry out partially redundant functions

To investigate biological functions of *BPS2* and *BPS3*, we used reverse genetic resources to isolate mutant alleles. For *BPS2*, we isolated one T-DNA insertion allele (*bps2-1*), two nonsense alleles (*bps2-2* and *bps2-3*) and 10 alleles with missense mutations (*bps2-4* to *bps2-13*) (see supplementary material Table S1) (McCallum et al., 2000b; Alonso et al., 2003; Till et al., 2003; Li et al., 2007). The *bps2-1* T-DNA integrated at W96, and the *bps2-2* and *bps2-3* mutations introduced premature stop codons at W63 and W96, respectively. For *BPS3*, we isolated one nonsense allele (*bps3-2*) and 14 alleles (*bps3-3* to *bps3-16*) with missense mutations (see supplementary material Table S1). Neither *bps2* nor *bps3* alleles showed detectable abnormal phenotypes at any developmental stage. We selected *bps2-2* and *bps3-2* for generating double and triple mutants as they were predicted to be null alleles.

We generated all three double mutant combinations and the triple mutant. The *bps2-2 bps3-2* double mutant showed no detectable abnormal phenotype, and *bps1-2 bps3-2* double mutants were indistinguishable from *bps1-2* single mutants. However, the *bps1-*

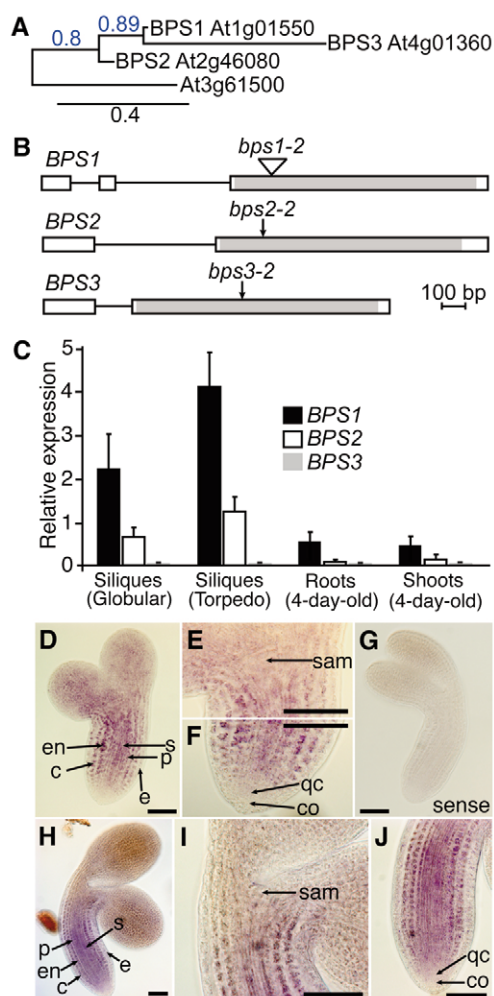

**Fig. 1. The *Arabidopsis* *BYPASS* gene family encodes conserved proteins that are predominantly expressed in siliques.** (A) An unrooted phylogenetic tree based on amino acid sequences of *Arabidopsis* *BPS* gene family members reveals a close relationship between *BPS1*, *BPS2* and *BPS3*. (B) The gene structure of *BPS1*, *BPS2* and *BPS3* reveals a very similar organization of exons (boxes) and introns (lines), with the coding region restricted to the 3'-most exon. Mutation sites for alleles used in this study are indicated by arrows. (C) Relative expression of *BPS1*, *BPS2* and *BPS3* in select tissues. Error bars are s.d. (D-J) In situ hybridization of *BPS1* in wild-type embryos. (D-G) Torpedo-stage embryos; (D-F) hybridization with antisense probe and (G) Sense probe. The shoot apical meristem and root meristem regions are shown at higher magnification in E and F, respectively. (H-J) Bent-cotyledon stage embryos; (I) SAM and (J) RAM of embryo shown in H. Scale bars: 50  $\mu$ m. c, cortex; co, columella; e, epidermis; en, endodermis; p, pericycle; qc, quiescent center; s, stele; sam, shoot apical meristem.

*2 bps2-2* double mutant showed additional phenotypes, and the *bps1-2 bps2-2 bps3-2* triple mutant showed severe seedling phenotypes. Among the mutant combinations, one phenotypic difference was seedling size; the *bps* triple mutants were less than half the size of *bps1 bps2* double mutants, which were similar in size to the *bps1-2* single mutant (Fig. 2; see supplementary material Fig. S1). Second, the basal pole of the *bps* triple mutants was blunt, with no sign of a normal root, and with white hypocotyl-like tissue. An organized root was also missing from the *bps1 bps2* double

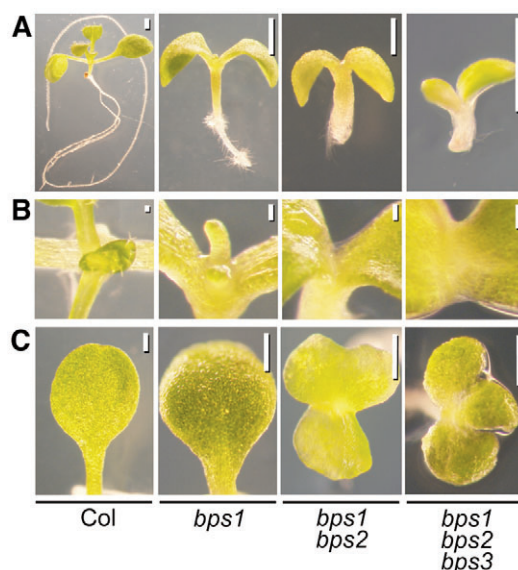

**Fig. 2. Seedling phenotypes of *bps1* and double and triple *bps* mutants.** Each column of this figure shows 9-day-old seedlings of the same genotype, and used the following alleles: *bps1-2*, *bps2-2* and *bps3-2*. (A) Comparison of seedling sizes and formation of root and hypocotyl. (B) Leaf initiation and the SAM region. The first leaf pair of the wild type (Col-0) extended out of the field shown, and leaf 3 obscured the view of the SAM. The *bps1* mutant produced two leaf primordia that arrest growth, and no leaf primordia were observed in *bps1 bps2* or *bps1 bps2 bps3* double and triple mutants. (C) Cotyledons of both the wild type (Col-0) and *bps1* have distinct blade and petiole, but *bps1 bps2* and *bps1 bps2 bps3* cotyledons blades lack petioles and are often fused along their margins. Scale bars: 1 mm in A; 100  $\mu$ m in B; 500  $\mu$ m in C.

mutant, but the hypocotyl was longer and included both green and white tissue (Fig. 2). Third, germination rates were progressively reduced in double and triple mutants (see next section).

The shoot apex of both *bps1 bps2* and *bps* triple mutants showed no evidence of leaf primordia, in contrast to *bps1-2*, which produces two small, arrested, leaf primordia (Fig. 2). Cotyledon defects were also more pronounced in the *bps1 bps2* double and *bps* triple mutants; cotyledons were smaller and, in most individuals, they were fused. This analysis also revealed a cotyledon defect in *bps1-2* single mutants. Wild-type seedlings produce two cotyledons, each on its own separate petiole. However, about 25% of *bps1* mutants in the Col-0 background (*bps1-2* and *bps1-5*) showed cotyledon defects, such as fused cotyledons (a single wide fused cotyledon and cotyledons with lobes) or supernumerary, yet unfused, cotyledons (see supplementary material Fig. S2). By contrast, cotyledons of the *bps1-1* allele (Landsberg *erecta* accession) were similar to the wild type. This phenotypic difference between the *bps1* alleles appeared to be caused by genetic background, as *bps1-5* has the same genetic lesion as *bps1-1*, but it is in the Col-0 accession, and its cotyledon phenotype is similar to *bps1-2*. We quantified the fused cotyledon phenotype in single, double and triple *bps* mutants (Fig. 2C, Fig. 3A; see supplementary material Table S3). Seedlings with cotyledon fusion ranged from just under 2% of the mutants for *bps1-2*, to 40% and 60% for *bps* double and triple mutants, respectively.

Among F2 progeny of *BPS1*<sup>+</sup>/*bps1-2* *BPS2*<sup>+</sup>/*bps2-2* F1 plants, the frequency of seedlings having the strong double mutant phenotype described above was close to 3/16 rather than the expected 1/16 (see supplementary material Table S5). This result



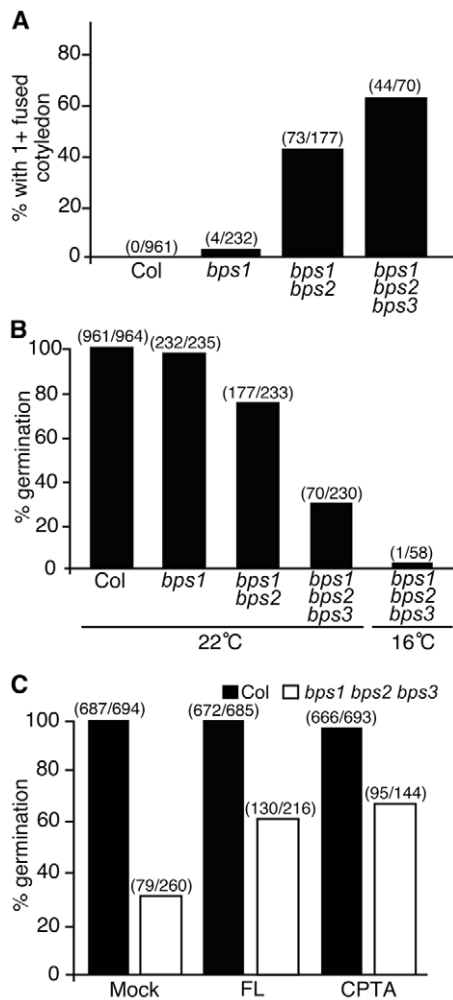

**Fig. 3. Germination and cotyledon formation are sensitive to loss of BPS activity.** (A) Quantitative analysis of the cotyledon fusion phenotype revealed increased penetrance in higher-order mutants. (B,C) Quantitative analysis of germination rates in *bps* single and multiple mutants (B) and in wild type (Col-0) and *bps* triple mutants from siliques treated with the carotenoid biosynthesis inhibitors FL and CPTA (C). The partial suppression of germination defects in *bps* triple mutants indicated that this phenotype required carotenoid biosynthesis, and that the activity of all three *BPS* gene products prevent synthesis of the *bps* signal. These analyses are based on the number of homozygous mutants (see supplementary material Table S3). The number of observed mutants and the number of expected mutants are listed above each bar on all three graphs.

suggested that, in the *bps1-2* mutant background, *BPS2* gene dose was limiting. We confirmed *BPS2* haploinsufficiency by crossing *BPS1<sup>+</sup>/bps1<sup>-</sup> bps2-2<sup>-/-</sup>* and *BPS1<sup>+</sup>/bps1<sup>-</sup> BPS2<sup>+/+</sup>*. All F1 progeny were heterozygous for *bps2-2* and the 25% *bps1-2* homozygotes all showed the more severe phenotype (see supplementary material Table S5).

### The severe *bps* triple mutant phenotype requires carotenoid biosynthesis

Because the *bps1* phenotype arises from a non-cell autonomous signal (Van Norman et al., 2004; Van Norman et al., 2011b), we expected that the enhanced phenotypes of *bps* double and triple mutants might also arise from this same non-cell-autonomous

signal. To test this possibility, we applied the same carotenoid biosynthesis inhibitors (CPTA and Fluridone) that partially rescued the *bps1* phenotype (Van Norman and Sieburth, 2007) to developing siliques of *BPS1<sup>+</sup>/bps1-2<sup>-/-</sup> bps2-2<sup>-/-</sup> bps3-2<sup>-/-</sup>* plants, and assessed rescue by quantifying germination of the *bps* triple mutant.

Treated siliques became white, indicating plastid photo-oxidation. Seeds from both CPTA- and FL-treated wild-type siliques showed normal germination frequency, and the CPTA- and FL-treated *BPS1<sup>+</sup>/bps1<sup>-</sup> bps2-2<sup>-/-</sup> bps3-2<sup>-/-</sup>* siliques produced triple mutants with much higher germination frequencies than controls (Fig. 3C). Together with the enhanced phenotypes of higher order mutants, these observations indicate that *BPS* gene products function redundantly during embryogenesis, and suggest that they negatively regulate a common signaling molecule whose synthesis requires carotenoid biosynthesis.

To further assess whether the severe *bps* triple mutant phenotype was caused by the *bps* signal, we compared germination of seedlings that had undergone embryogenesis at 16°C. The *bps1* phenotype is enhanced at low temperature (Van Norman et al., 2004), and germination defects of *bps* triple mutants were also enhanced by low temperature (Fig. 3B; see supplementary material Table S3). This result further links the increased severity of the multiple *bps* mutants to the non-cell-autonomous signal characterized in the *bps1* single mutant. This, together with partial phenotypic suppression by carotenoid biosynthesis inhibitors, indicates that all three *BPS* genes contribute to preventing synthesis of the *bps* signal, and that it affects both embryonic and post-embryonic stages of development.

### Embryogenesis defects in *bps* triple mutants

Many of the phenotypes present in *bps* triple mutant seedlings, such as cotyledon and meristem formation, represent defects in embryonic processes. Moreover, seedling analyses only allowed us to examine those uncommon triple mutants that had germinated. We therefore characterized embryogenesis in the *bps* triple mutant. Major defects were apparent in walking-stick and mature embryos, whereas defects in heart-stage embryos were modest (see supplementary material Fig. S3). We characterized more than 1200 embryos dissected from siliques of *BPS1<sup>+</sup>/bps1-2<sup>-/-</sup> bps2-2<sup>-/-</sup> bps3-2<sup>-/-</sup>* plants (see supplementary material Table S6). Using the phenotypically normal *bps2 bps3* double mutants as internal staging controls, the *bps* triple mutant embryos had a pronounced developmental delay starting at the late globular stage. This coincided with the first appearance of morphological defects, a cell division defect in the inner-most cells. In the wild type, these internal cells differentiate into procambium, which is reflected by a stereotyped division resulting in narrow elongated cells aligned along the embryo axis (Scheres et al., 1994), but the *bps* triple mutants failed to undergo this stereotypical division (Fig. 4; supplementary material Table S6).

As wild-type embryos progress to transition stage, stereotypical cell divisions in the apical subepidermal cells give rise to the presumptive SAM (Barton and Poethig, 1993) and at the basal end, the lenticular and basal cells both undergo anticlinal divisions to give rise to the quiescent center and columella precursor cells, respectively (Fig. 4) (Scheres et al., 1994). The age-matched *bps* triple mutants failed to undergo both these sets of cell divisions, and instead continued to resemble mid-globular stage embryos.

The wild-type heart-stage embryos have distinct cotyledon lobes, an increased number of vascular precursor cells and two layers of cells in the columella lineage (Fig. 4). The age-matched *bps* triple

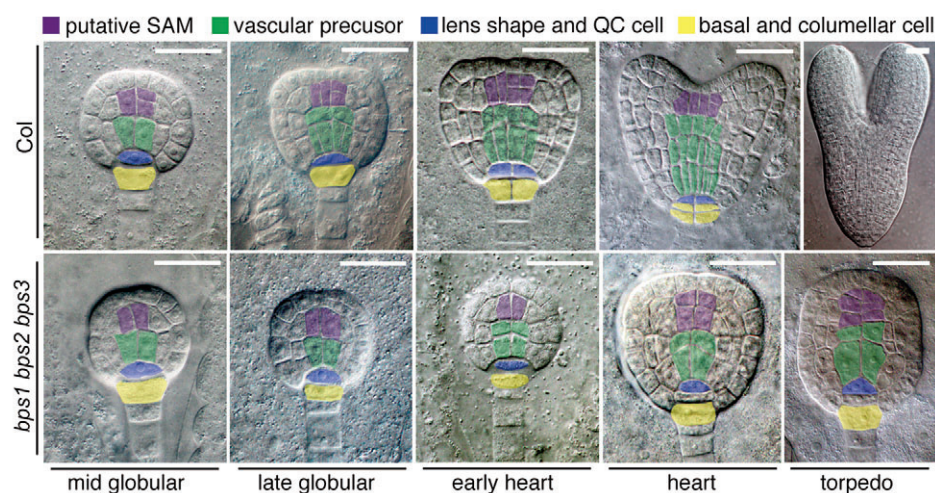

**Fig. 4. Embryonic cell division defects in vascular and root meristem precursors of *bps* triple mutants.** Top row: wild-type (*Col-0*) embryos. Bottom row: *bps1-2 bps2-2 bps3-2* triple mutant embryos. Embryo staging was based on phenotypically wild-type siblings (*bps2 bps3*), and is indicated below the images. DIC images were false colored to facilitate comparisons of cell types between the wild type and the *bps* triple mutant. The major defects identified in this analysis were provascular/procambium development and cell divisions at the root apex. Scale bars: 25  $\mu$ m in all images except the wild-type torpedo embryo (50  $\mu$ m).

mutant embryos lacked distinct cotyledon lobes, although some ground cells underwent periclinal cell divisions. The vascular precursors appeared to increase in size, but there was no evidence of cell division or their elongation into typical procambial cells. Cells in the SAM precursor position were enlarged relative to those in wild-type embryos, and the increased number of SAM precursors indicated some cell division activity in that region. Finally, at the root pole, the *bps* triple mutant displayed an abnormal three-tiered structure consisting of broad cells, which appeared to have arisen from an abnormal periclinal division of the lenticular cell.

The wild-type torpedo embryos are much larger than the earlier stages, especially in cotyledon and hypocotyl length. By contrast, age-matched *bps* triple mutants showed remarkably little change. They resembled a slightly elongated globular embryo, with isodiametric cells in place of procambium, an abnormal root pole

and no cotyledon lobes (Fig. 4). These observations reflect an acute requirement for BPS activity for progression through the globular stage, and revealed a particularly severe impact on the vascular, root and shoot stem cell populations.

#### ***bps* triple mutant embryo defects are accompanied by altered gene expression**

To assess the interaction between the *bps* signal and known pathways regulating embryogenesis, we analyzed expression patterns of six reporter genes (Fig. 5). Possible links to processes requiring auxin transport and transcriptional response were assessed using *pPIN1::PIN1-GFP* and *DR5(rev)::GFP*. Patterns of *pPIN1::PIN1-GFP* have been well documented in wild-type embryos (Steinmann et al., 1999; Benková et al., 2003; Friml et al., 2003). It is expressed throughout wild-type globular-stage embryos, and as the embryo progresses to heart stage, it is increasingly

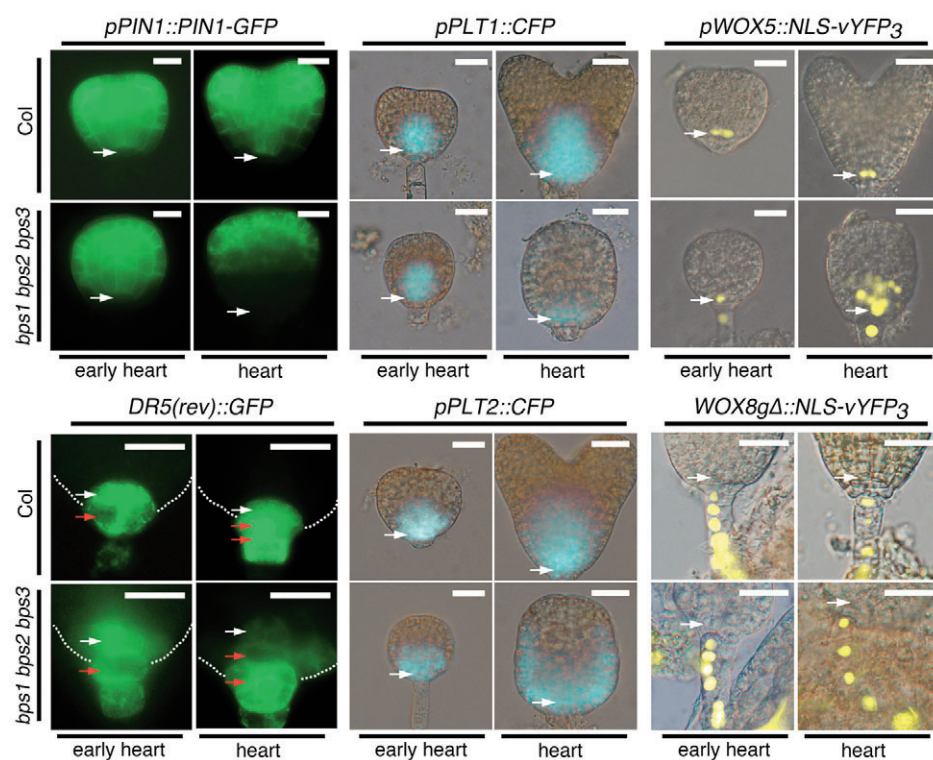

**Fig. 5. Embryogenesis defects in *bps* triple mutants are accompanied by altered expression of developmental regulators.** Fluorescent protein marker expression in wild type (*Col*) and *bps* triple mutant embryos at early and mid-heart stages. Expression patterns from six markers are shown: *pPIN1::PIN1-GFP*; *DR5(rev)::GFP*; *pPLT1::CFP*; *pPLT2::CFP*; *pWOX5::NLS-vYFP3*; and *WOX8gΔ::NLS-vYFP3*. In general, the *bps* triple mutant establishes normal expression patterns of these markers during the early heart stage, but shows altered expression by mid-heart stage, except *WOX8*, which shows normal expression in the suspensors of the triple mutant embryo. White arrows indicate lens-shape or quiescent center cells; red arrows indicate basal or columella cells. Scale bars: 50  $\mu$ m.



localized to cotyledon primordia and the procambial cells (Fig. 5). We observed no defect in *pPIN1::PIN1-GFP* expression in *bps* triple mutants until mid-heart stage, when PIN1-GFP failed to localize within the procambial tissue, and instead expression was concentrated in the upper tier of cells. In addition, expression failed to become concentrated in the incipient cotyledons as is seen in the wild type (supplementary material Fig. S4). By the torpedo stage, *bps* triple mutants showed some PIN1-GFP localization in the procambial region, albeit in a broad, short and diffuse pattern (see supplementary material Fig. S4). In late torpedo *bps* triple embryos, PIN1-GFP had resolved into distinct expression through the center of small cotyledon lobes, and into a broad region that corresponds to the procambial area of the presumptive hypocotyl.

*DR5(rev)::GFP* expression in the developing root apex of wild-type globular and heart-stage embryos is primarily in the lenticular/QC and basal/columella cells (Friml et al., 2003). Again, we observed no defect in *DR5(rev)::GFP* expression in *bps* triple mutants until mid-heart stage, when *DR5(rev)::GFP* expression was reduced overall, and nearly undetectable in the QC. Instead, *DR5(rev)::GFP* was largely restricted to the lower-most columella cells, with very faint signal in the flanking lateral root cap cells. Altered *DR5(rev)::GFP* expression in the developing root of *bps* triple mutants is consistent with the pattern of PIN1-GFP expression; loss of PIN1-GFP in the central procambial region suggests that auxin is not properly transported to the basal pole at heart stage.

Another important pathway for root specification uses the *PLETHORA (PLT)* transcription factors (Aida et al., 2004; Blilou et al., 2005; Galinha et al., 2007; Smith and Long, 2010). We analyzed expression from *PLT1* and *PLT2* transcriptional fusions in *bps* triple mutants (Fig. 5). *pPLT1::CFP* is expressed in central regions of the lower pole of the early heart-stage embryo, and in later heart stages, expression expands to include the provascular tissues and a broad region of the presumptive root apex. The *bps* triple mutants showed normal *pPLT1::CFP* expression through the early heart-stage, but by mid-heart stage, expression was diminished and was slightly less concentrated at the root pole. Wild-type expression of *PLT2* is similar to *PLT1*, and in *bps* triple mutants, *pPLT2::CFP* showed normal expression until mid-heart stage, when it was diminished in the center of the embryo, yet had expanded to a large U-shaped domain that encompassed the peripheral cells of the lower half of the embryo.

Another class of developmental regulators is the *WUSCHEL-RELATED HOMEODOMAIN (WOX)* genes (Haecker et al., 2004; Sarkar et al., 2007; Breuninger et al., 2008). We examined expression of *WOX5 (pWOX5::NLS-vYFP<sub>3</sub>)* and *WOX8 (WOX8gΔ::NLS-vYFP<sub>3</sub>)* transcriptional reporters in *bps* triple mutants. In the wild type, *WOX5* is expressed in the hypophysis and lens-shaped cell during globular stages, and then is restricted to QC cells in heart and later stages. The *bps* triple mutant showed a normal *pWOX5::NLS-vYFP<sub>3</sub>* expression pattern until the mid-heart stage, when ectopic expression was found though much of the basal pole of the embryo (Fig. 5). Expression of *WOX8gΔ::NLS-vYFP<sub>3</sub>* was the same in wild type and *bps* triple mutants, where its expression was restricted to the suspensor. Together, these expression analyses suggest a normal establishment of embryonic patterning, but that broad developmental defects arose during the heart stage.

### Ectopic root pole development in *bps* triple mutants

The root pole normally forms in alignment with the suspensor; however, we frequently observed a putative ectopic root pole extending from the side of *bps* mutant embryos (Fig. 6A).

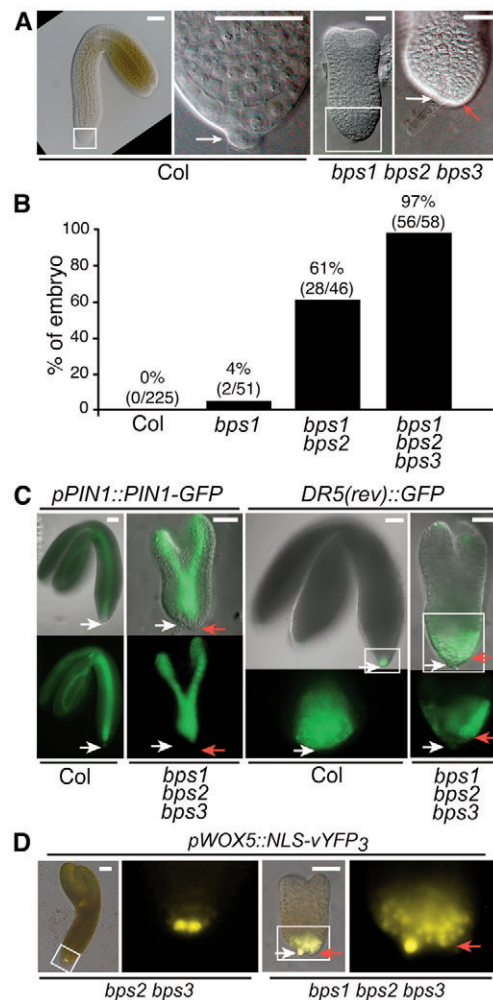

**Fig. 6. Root pole formation defects in *bps* triple mutants.** (A) DIC images of bent-cotyledon stage embryos of wild type (Col) and *bps1-2 bps2-2 bps3-2* triple mutants. Each pair of images shows the embryo (left), and a higher magnification of the boxed area (right). (B) Frequency of root pole-suspensor misalignment; the graph depicts the number of mutants with misaligned poles relative to the total number of mutants examined. (C) Expression of *pPIN1::PIN1-GFP* and *DR5(rev)::GFP* in bent-cotyledon stage embryos of wild-type and *bps1-2 bps2-2 bps3-2* triple mutants. The asymmetry of both *pPIN1::PIN1-GFP* and *DR5(rev)::GFP* in the *bps* triple mutants is consistent with auxin-directed recruitment of an ectopic root pole. (D) Expression of *pWOX5::NLS-vYFP<sub>3</sub>* in walking-stick stage embryos of wild type and *bps1-2 bps2-2 bps3-2*. Ectopic expression in the *bps* triple mutants is consistent with altered root specification at the basal pole of the *bps* triple mutant. White arrows indicate suspensor; red arrows indicate the ectopic root pole. Scale bars: 50  $\mu$ m.

Quantitative analysis of embryonic root pole-suspensor alignment revealed this phenotype to be a general feature of *bps* mutants, and with higher penetrance in the higher order mutants (Fig. 6B). Because auxin is strongly linked to root development (Steinmann et al., 1999; Benková et al., 2003; Friml et al., 2003), we analyzed *pPIN1::PIN1-GFP* and *DR5(rev)::GFP* expression in bent-cotyledon stage embryos (Fig. 6C). In the *bps* triple mutant hypocotyl, *pPIN1::PIN1-GFP* expression was broader than that observed in the wild type, and at the basal pole of the embryo, asymmetric expression extended towards the putative ectopic root

pole, instead of adjacent towards the suspensor (Fig. 6C). In wild type, *DR5(rev)::GFP* is prominent in the quiescent center (QC) and columella cells (Friml et al., 2003; Blilou et al., 2005). However, in *bps* triple mutants, *DR5(rev)::GFP* expression appeared broad and asymmetrical at the root apex, and with the strongest expression aligned with the putative ectopic root pole.

The *PIN1* and *DR5* expression patterns suggested the recruitment of a new root pole in the *bps* triple mutant embryo. To assess this possibility, we followed expression of *pWOX5::NLS-vYFP* (Haecker et al., 2004). The phenotypically wild-type *bps2-2 bps3-2* walking-stick stage embryos showed normal *pWOX5::NLS-vYFP* expression in the QC, whereas stage-matched *bps* triple mutants expressed *pWOX5::NLS-vYFP* in a broader region of the developing root (Fig. 6D). Expression was typically tilted away from alignment with the suspensor, similar to *DR5(rev)::GFP*, and was stronger at the morphological root pole. Ectopic *pWOX5::NLS-YFP* expression at the top of the suspensor suggests that this cell type might also be mis-specified in *bps* triple mutants. Together with *pPIN1::PIN1-GFP* and *DR5(rev)::GFP* expression patterns, these observations suggest that *bps* triple mutants show auxin-mediated recruitment of a second root pole.

### Auxin responses in *bps1* leaves

Analysis of *bps* triple mutant embryos revealed changes in expression of both auxin-related markers (*PIN1* and *DR5*) and developmentally important transcription factors (*PLT1*, *PLT2* and *WOX5*). The growth, patterning and cell differentiation phenotypes of *bps* triple mutant embryos could be consistent with altered auxin response; however, because changes in marker expression lagged behind the morphological defects, whether or not the primary response to the *bps* signal was altered auxin signaling was unclear.

Previously, we found that *DR5::GUS* expression in *bps1* leaves was recalcitrant to exogenous auxin activation (Van Norman et al., 2004). We revisited this experiment, testing whether auxin responsiveness of *DR5::GUS* was restored if the source of the *bps1* signal (the root) was removed. Five hours after root excision, the *bps1* leaf primordia were able to induce *DR5::GUS* expression in response to auxin (Fig. 7A). This result linked *DR5::GUS* auxin responsiveness to the *bps* signal.

Next, we examined whether the *bps* signal inhibited auxin-induced proteolysis using plants carrying a *pIAA18::IAA18-GUS* reporter gene. Transcription of this reporter is auxin independent, but its protein product is destabilized by the motif II auxin receptor recognition sequence (Ploense et al., 2009). We reasoned that if the *bps* signal induced stabilization of this class of proteins, then *bps1* seedlings would show much stronger *pIAA18::IAA18-GUS* expression than the wild type (Plonse et al., 2009). However, wild-type and *bps1* leaf primordia showed very similar expression patterns (Fig. 7B), indicating normal *IAA18* proteolysis in the *bps1* leaves, and suggesting that the *bps* signal is not a general inhibitor of auxin-induced proteolysis of the AUX/IAA transcriptional repressors.

Another possible mechanism for *bps* signal interference with auxin processes would be to inhibit establishment of normal auxin transport patterns. To assess whether auxin transport patterns were established normally, we compared *pPIN1::PIN1-GFP* localization in three-day leaf primordia. This is the stage when leaf development begins to deviate in the *bps1* mutant. However, *PIN1-GFP* expression pattern and localization appeared the same in the two genotypes (Fig. 7C), indicating that the *bps* signal does not directly interfere with *PIN1* expression or localization.

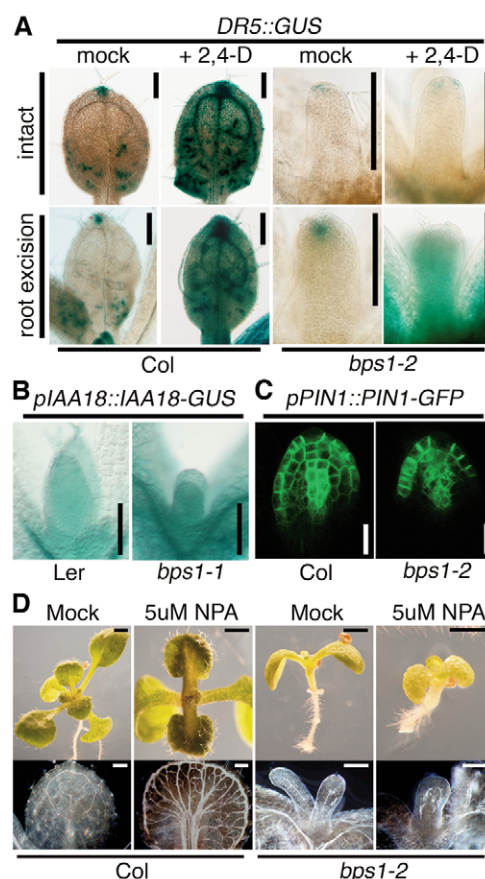

**Fig. 7. Leaf development and auxin responses in *bps1* mutants.**

(A) Seven-day-old seedlings were either mock treated or supplied with 10  $\mu$ M 2,4-D for 6 hours, and GUS stained for 12 hours, either with intact seedlings (top row) or with seedlings that had undergone root excision (bottom row). Auxin-induced *DR5::GUS* expression was observed only in *bps1* leaf primordia following root excision. (B) GUS-stained leaf primordia of 5-day-old wild type and *bps1* carrying *pIAA18::IAA18-GUS*. (C) *PIN1-GFP* patterns in leaf primordia of 3-day-old wild type and *bps1* mutants. (D) Growth on NPA-supplemented media. NPA-treated *bps1* leaf shows partial vein formation at the periphery of the leaf. Scale bars: 1 mm in the top row of D; 200  $\mu$ m in A and the bottom row of D; 20  $\mu$ m in C. In B 100  $\mu$ m.

We also examined how *bps1* leaf primordia respond to an altered auxin distribution by growing seedlings on media supplemented with the polar auxin transport inhibitor *N*-1-naphthylphthalamic acid (NPA). In wild-type leaves, NPA inhibits differentiation of the primary vein, and results in an increased number of secondary veins around the leaf periphery (Mattsson et al., 1999; Sieburth, 1999). The leaves of NPA-grown *bps1* lacked the single primary vein that is typically produced, and instead produced veins at the periphery of the leaf (Fig. 7D). These similar developmental responses to NPA suggest that the *bps* signal does not interfere with leaf developmental responses to altered auxin transport.

Of these four assays to analyze leaf-specific auxin processes in *bps1* mutants, three suggested that auxin processes are normal. The sole exception was auxin inducibility of *DR5::GUS*. *DR5::GUS* is a very useful reporter; however, it is also responsive to brassinolide, and can be inconsistent with auxin levels (Nakamura et al., 2003; de Reuille et al., 2006).



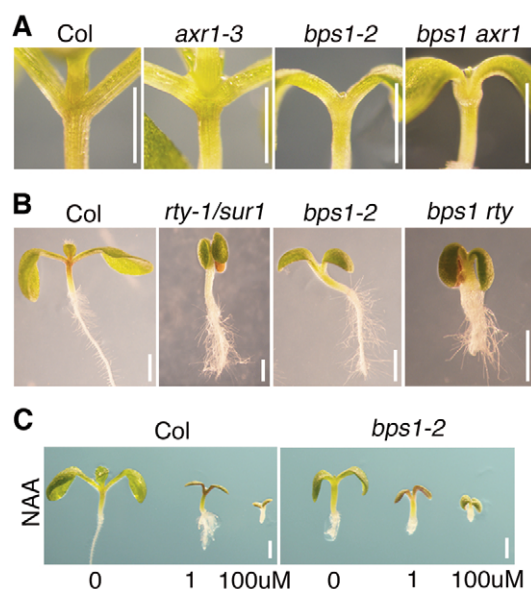

**Fig. 8. Auxin responses in *bps1* and wild-type seedlings.** (A) Double mutant analysis reveals a novel phenotype in *bps1-2 axr1-3* double mutants. (B) Double mutant analysis reveals an additive phenotype between *bps1-2* and *rty-1*. (C) Growth on auxin-supplemented medium causes similar responses in the wild type (Col) and *bps1-2*. Scale bars: 1 mm

### Auxin responses in *bps1* seedlings

To further investigate the relationship between the *bps* signal and auxin, we also carried out whole-seedling analyses. Double mutants that combined *auxin resistant 1* (*axr1-3*) (Leyser et al., 1993) and *bps1-2* were nearly indistinguishable from *bps1* single mutants (Fig. 8A). However, they produced a novel phenotype, a bulbous expansion at the base of the cotyledon petioles. Although the developmental significance of this phenotype is unclear, it revealed that, in *bps1* single mutants, AXR1 is functional at the hypocotyl-cotyledon junction, a position predicted to experience a high level of root-derived *bps* signal. Intact auxin response was also suggested by the phenotypic response of *bps1* to excess auxin. *rooty/superroot* (*rty-1*) mutants produce excess auxin endogenously, which results in epinastic cotyledons and excess lateral roots (Boerjan et al., 1995; Mikkelsen et al., 2004). The *bps1 rty* double mutants showed an additive phenotype: arresting as small plants with *bps1*-like roots and small epinastic cotyledons (Fig. 8B). Similarly, *bps1* mutants grown on auxin-supplemented media showed similar reduced growth, thickened hypocotyl and altered cotyledons (Fig. 8C).

To further address whether auxin-induced transcriptional responses are intact in *bps1* mutants, we used real-time RT-PCR to compare auxin-induced expression of primary auxin response genes (Paponov et al., 2008). Wild-type and *bps1* showed a similar strong increase in transcript levels in response to exogenous auxin (Fig. 9A), supporting intact auxin responses in *bps1* mutants.

### PIN polar localization and cycling is intact in *bps1* mutants

Finally, it was possible that the *bps* signal affected PIN protein trafficking. PIN proteins show highly stereotyped polar membrane localization patterns, and also traffic between the plasma membrane and the endosome (Steinmann et al., 1999; Geldner et al., 2001; Geldner et al., 2003). We analyzed PIN1-GFP localization in wild-

type and *bps1* roots of 3-day-old seedlings. Similar plasma membrane localization of PIN1-GFP was observed, although its expression was strongly reduced in *bps1* (Fig. 9B). In addition, both genotypes showed a similar response to brefeldin A (BFA), which inhibits membrane trafficking and leads to PIN1 accumulation in an endosome-like compartment. These observations suggest that PIN1 trafficking is not the target of the *bps* signal.

### DISCUSSION

The *Arabidopsis* *BYPASS1* gene has previously been shown to prevent root tissues from producing a mobile compound (the *bps* signal) that is transported to the shoot, where it arrests development (Van Norman et al., 2004). This pathway remains largely uncharacterized, and major questions include the identity of the *bps* signal, biochemical functions of the BPS1 protein, and the mechanism by which the *bps* signal affects plant development. In this study, we extended the functional analysis to include the other two *Arabidopsis* homologs, *BPS2* and *BPS3*, and analyzed the developmental responses to *bps* signal-induced growth arrest in embryos and *bps1* single mutants. We found that the three *BPS* genes have partially overlapping roles in preventing excess synthesis of the *bps* signal. How the *bps* signal affected development was further analyzed using developmental markers and through analysis of auxin responses. Our results indicate that the *bps* signal affects development by an auxin-independent mechanism.

### Functional redundancy and haploinsufficiency among BPS gene family

The *Arabidopsis* *BPS1* gene is both the highest expressed of the gene family, and it is the only one for which we observed a single mutant phenotype, indicating that this gene plays the most prominent role. However, *BPS2* and *BPS3* carry out related functions, because we found progressively more severe phenotypes in *bps1 bps2* and *bps1 bps2 bps3* mutants. Phenotypes of the higher order mutants originated during embryogenesis, which is consistent with their expression profiles. A common function for these three genes was revealed by experiments using carotenoid biosynthesis inhibitors. Like *bps1* single mutants, the inhibitors partially suppressed the embryonic phenotype of *bps* triple mutants; thus, all three genes appear to regulate the synthesis of the same mobile compound.

We also found that *BPS2* behaves in a dose-dependent manner, as *BPS2* is haploinsufficient in a *bps1* homozygous mutant background. Other dose-dependent regulators include miR165/166, where dosage in root tissues arises due to miRNA mobility, and leads to fine-scale patterning of root vascular cell types (Carlsbecker et al., 2010; Miyashima et al., 2011), stomagen, which regulates stomatal density based on the amount produced in mesophyll cells (Sugano et al., 2010), and the *PLT* genes, the products of which appear in gradients that confer spatial patterning to the root meristem (Galinha et al., 2007). Dose dependence of *BPS2* suggests that plants can tightly regulate the amount of *bps* signal produced, a feature consistent with a developmentally important molecule.

### The *bps* signal modulates development in parallel with auxin

Identification of the molecular target of the *bps* signal is crucial for understanding this enigmatic pathway. To address this question, we traced the earliest morphological defect to procambium specification in the late globular embryo. Procambial identity has been linked to auxin (Reinhardt, 2003; Scarpella et al., 2004;



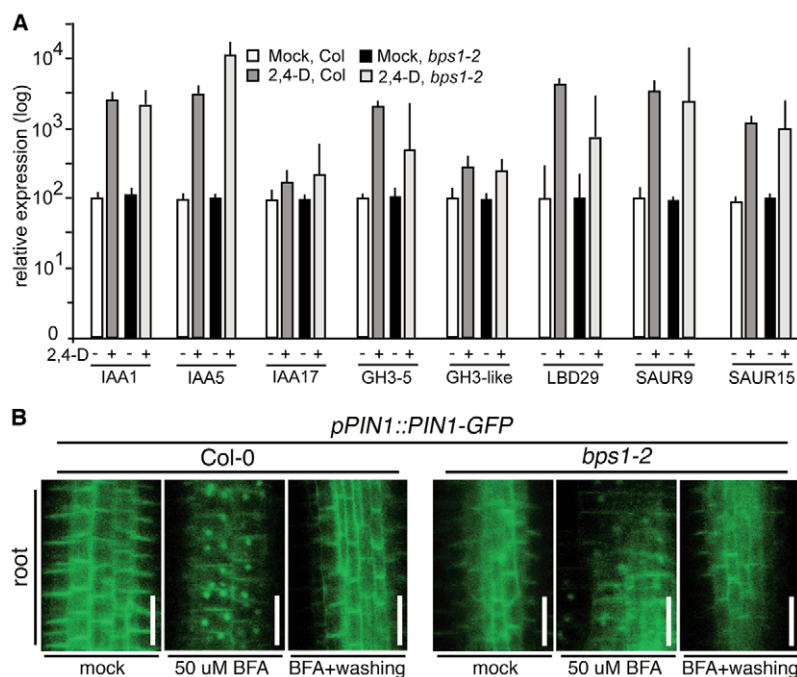

**Fig. 9. Auxin-responsive gene expression and PIN-GFP cycling are intact in *bps* triple mutant.** (A) Real-time RT-PCR analysis of transcript levels in 4-day-old seedlings. Relative expression, graphed on a log scale, shows a similar response to auxin in the wild type (Col) and *bps1-2*. Error bars show s.d. (B) Patterns of *pPIN1::PIN1-GFP* in 3-day-old wild type and *bps1-2* roots. PIN1-GFP expression was diminished in *bps1-2*, and the cells are less organized; however, the PIN1-GFP shows normal localization and normal responses to BFA treatment. Scale bars: 20  $\mu$ m

Scarpella et al., 2006). However, two auxin-related embryonic markers, *pPIN1::PIN1-GFP* and *DR5(rev)::GFP*, showed normal expression through to mid-heart stage, suggesting that auxin transport and responses were intact when the procambial defect arose. Nevertheless, auxin signaling was an attractive candidate for the target of the *bps* signal, as expression of the *DR5::GUS* auxin reporter in *bps1* leaf primordia is only auxin inducible if the *bps* signal source, the root, is removed, and because many of the *bps* triple mutant phenotypes are similar to those reported for mutants with auxin-related defects (Bennett et al., 1995; Hadfi et al., 1998; Mravec et al., 2008). However, we found no independent support for defects in auxin signaling in *bps1* leaf primordia or whole plants.

Instead, the *bps* signal appears to reveal a novel developmental pathway with functions during embryogenesis and in vegetative growth. The strongest effect of the *bps* signal appears to be on stem cells, e.g. the root and shoot meristems in *bps1* seedlings, and the procambial stem cells of the *bps* triple mutant embryo. An attractive molecular target of the *bps* signal might be something shared by all three of these cell types. Indeed, parallel signaling pathways using a small peptide, a receptor and a WOX transcription factor that play crucial roles in regulation of all three stem cell types have been described (Sablowski, 2010; Stahl and Simon, 2010). Consistent with this possibility, the pattern of PIN1-GFP distribution during *bps* triple mutant embryogenesis is similar to that of mutants with defects in two protein phosphatase 2A genes, *POLTERGEIST* (*POL*) and *POLTERGEIST-LIKE* (*PLL*), which function downstream from CLV1 (Song et al., 2008). Recently, the CLE41/TDIF-PXY/TDR-WOX4 module has been shown to be required for vascular development and procambium auxin responsiveness (Hirakawa et al., 2010; Ji et al., 2010; Suer et al., 2011), and is a possible candidate for the developmental target of the *bps* signal. Alternative developmental regulators that might be attractive candidates for the *bps* signal include *KANADI* and the Class II HD-ZIP transcription factors (Ito et al., 2006; Hirakawa et al., 2010; Ilegems et al., 2010), which also function upstream of auxin, and in vascular patterning pathways.

Targeting of developmental pathways by the *bps* signal appears to be supported by the *pPLT1::CFP* and *pPLT2::CFP* marker expression patterns; in *bps* triple mutants, we found broad ectopic expression of *pPLT2::CFP* in mid-heart-stage embryos, but reduced, and only slightly ectopic, expression of *PLT1*. Although ectopic *PLT* expression has been observed in *pin* mutants, and has been attributed to the failure to concentrate auxin at the root meristem (Blilou et al., 2005), *PLT1* and *PLT2* tend to show similar expression patterns. Thus, these data suggest a novel developmental mechanism of the *bps* signal. Determining how the *bps* signal modulates development, including *PLT* expression, is an important goal of our future studies.

#### Acknowledgements

We thank Arabidopsis Biological Resource Center for providing *bps2*, *bps3*, *axr1-3* and *rti* mutant alleles; Jiri Friml for *DR5(rev)::GFP*; Elliot Meyerowitz for *pPIN1::PIN1-GFP*; Thomas Laux for *pWOX5::NLS-vYFP3* and *WOX8gΔ::NLS-vYFP3*; and Ben Scheres for *pPLT1::CFP* and *pPLT2::CFP*. We are also grateful to A. M. Hornsby for general laboratory assistance and to Hui Tian for helpful discussions.

#### Funding

This research was supported by grants from the National Science Foundation [IOS-0922288] and the National Institute of Food and Agriculture [2008-35304-04488] to L.E.S.

#### Competing interests statement

The authors declare no competing financial interests.

#### Supplementary material

Supplementary material available online at <http://dev.biologists.org/lookup/suppl/doi:10.1242/dev.077313/-/DC1>

#### References

- Aida, M., Beis, D., Heidstra, R., Willemsen, V., Blilou, I., Galinha, C., Nussaume, L., Noh, Y.-S., Amasino, R. and Scheres, B. (2004). The PLETHORA genes mediate patterning of the Arabidopsis root stem cell niche. *Cell* **119**, 109–120.
- Alonso, J. M., Stepanova, A. N., Leisse, T. J., Kim, C. J., Chen, H., Shinn, P., Stevenson, D. K., Zimmerman, J., Barajas, P., Cheuk, R. et al. (2003). Genome-wide insertional mutagenesis of Arabidopsis thaliana. *Science* **301**, 653–657.

- Barton, M. and Poethig, R. (1993). Formation of the shoot apical meristem in *Arabidopsis thaliana*: an analysis of development in the wild type and in the shoot meristemless mutant. *Development* **119**, 823-831.
- Benjamins, R. and Scheres, B. (2008). Auxin: the looping star in plant development. *Annu. Rev. Plant Biol.* **59**, 443-465.
- Benková, E., Michniewicz, M., Sauer, M., Teichmann, T., Seifertová, D., Jürgens, G. and Friml, J. (2003). Local, efflux-dependent auxin gradients as a common module for plant organ formation. *Cell* **115**, 591-602.
- Bennett, S., Alvarez, J., Bossinger, G. and Smyth, D. (1995). Morphogenesis in *pinoid* mutants of *Arabidopsis thaliana*. *Plant J.* **8**, 505-520.
- Blilou, I., Xu, J., Wildwater, M., Willemsen, V., Paponov, I., Friml, J., Heidstra, R., Aida, M., Palme, K. and Scheres, B. (2005). The PIN auxin efflux facilitator network controls growth and patterning in *Arabidopsis* roots. *Nature* **433**, 39-44.
- Boerjan, W., Cervera, M. T., Delarue, M., Beeckman, T., Dewitte, W., Bellini, C., Caboche, M., Van Onckelen, H., Van Montagu, M. and Inzé, D. (1995). Superrout, a recessive mutation in *Arabidopsis*, confers auxin overproduction. *Plant Cell* **7**, 1405-1419.
- Breuninger, H., Rikirsch, E., Hermann, M., Ueda, M. and Laux, T. (2008). Differential expression of WOX genes mediates apical-basal axis formation in the *Arabidopsis* embryo. *Dev. Cell* **14**, 867-876.
- Carlsbecker, A., Lee, J.-Y., Roberts, C. J., Dettmer, J., Lehesranta, S., Zhou, J., Lindgren, O., Moreno-Risueno, M. A., Váten, A., Thitamadee, S. et al. (2010). Cell signalling by microRNA165/6 directs gene dose-dependent root cell fate. *Nature* **465**, 316-321.
- Cheng, Y., Dai, X. and Zhao, Y. (2007). Auxin synthesized by the YUCCA flavin monooxygenases is essential for embryogenesis and leaf formation in *Arabidopsis*. *Plant Cell* **19**, 2430-2439.
- Crawford, S., Shinohara, N., Sieberer, T., Williamson, L., George, G., Hepworth, J., Muller, D., Domagalska, M. A. and Leyser, O. (2010). Strigolactones enhance competition between shoot branches by dampening auxin transport. *Development* **137**, 2905-2913.
- de Reuille, P. B., Bohn-Courseau, I., Jung, K., Morin, H., Carraro, N., Godin, C. and Traas, J. (2006). Computer simulations reveal properties of the cell-cell signaling network at the shoot apex in *Arabidopsis*. *Proc. Natl. Acad. Sci. USA* **103**, 1627-1632.
- Dereeper, A., Guignon, V., Blanc, G., Audic, S., Buffet, S., Chevenet, F., Dufayard, J.-F., Guindon, S., Lefort, V., Lescot, M. et al. (2008). Phylogeny.fr: robust phylogenetic analysis for the non-specialist. *Nucleic Acids Res.* **36**, W465-W469.
- Domagalska, M. A. and Leyser, O. (2011). Signal integration in the control of shoot branching. *Nat. Rev. Mol. Cell. Biol.* **12**, 211-221.
- Friml, J., Vieten, A., Sauer, M., Weijers, D., Schwarz, H., Hamann, T., Offringa, R. and Jürgens, G. (2003). Efflux-dependent auxin gradients establish the apical-basal axis of *Arabidopsis*. *Nature* **426**, 147-153.
- Galinha, C., Hoffhuis, H., Luijten, M., Willemsen, V., Blilou, I., Heidstra, R. and Scheres, B. (2007). PLETHORA proteins as dose-dependent master regulators of *Arabidopsis* root development. *Nature* **449**, 1053-1057.
- Geldner, N., Friml, J., Stierhof, Y. D., Jürgens, G. and Palme, K. (2001). Auxin transport inhibitors block PIN1 cycling and vesicle trafficking. *Nature* **413**, 425-428.
- Geldner, N., Anders, N., Wolters, H., Keicher, J., Kornberger, W., Muller, P., Delbarre, A., Ueda, T., Nakano, A. and Jürgens, G. (2003). The *Arabidopsis* GNOM ARF-GEF mediates endosomal recycling, auxin transport, and auxin-dependent plant growth. *Cell* **112**, 212-230.
- Hadfi, K., Speth, V. and Neuhaus, G. (1998). Auxin-induced developmental patterns in *Brassica juncea* embryos. *Development* **125**, 879-887.
- Haecker, A., Groß-Hardt, R., Geiges, B., Sarkar, A., Breuninger, H., Herrmann, M. and Laux, T. (2004). Expression dynamics of WOX genes mark cell fate decisions during early embryonic patterning in *Arabidopsis thaliana*. *Development* **131**, 657-668.
- Hardtke, C. S. and Berleth, T. (1998). The *Arabidopsis* gene MONOPTEROS encodes a transcription factor mediating embryo axis formation and vascular development. *EMBO J.* **17**, 1405-1411.
- Heisler, M. G., Ohno, C., Das, P., Sieber, P., Reddy, G. V., Long, J. A. and Meyerowitz, E. M. (2005). Patterns of auxin transport and gene expression during primordium development revealed by live imaging of the *Arabidopsis* inflorescence meristem. *Curr. Biol.* **15**, 1899-1911.
- Hejácík, J., Blilou, I., Brewer, P. B., Friml, J., Scheres, B. and Benková, E. (2006). In situ hybridization technique for mRNA detection in whole mount *Arabidopsis* samples. *Nat. Protoc.* **1**, 1939-1946.
- Henikoff, S., Till, B. J. and Comai, L. (2004). TILLING. Traditional mutagenesis meets functional genomics. *Plant Physiol.* **135**, 630-636.
- Hirakawa, Y., Kondo, Y. and Fukuda, H. (2010). TDIF peptide signaling regulates vascular stem cell proliferation via the WOX4 homeobox gene in *Arabidopsis*. *Plant Cell* **22**, 2618-2629.
- Ilegems, M., Douet, V., Meylan-Bettex, M., Uyttewaald, M., Brand, L., Bowman, J. L. and Stieger, P. A. (2010). Interplay of auxin, KANADI and Class III HD-ZIP transcription factors in vascular tissue formation. *Development* **137**, 975-984.
- Ito, Y., Nakanomyo, I., Motose, H., Iwamoto, K., Sawa, S., Dohmae, N. and Fukuda, H. (2006). Dodeca-CLE peptides as suppressors of plant stem cell differentiation. *Science* **313**, 842-845.
- Jenik, P. D., Jurkuta, R. E. J. and Barton, M. K. (2005). Interactions between the cell cycle and embryonic patterning in *Arabidopsis* uncovered by a mutation in DNA polymerase epsilon. *Plant Cell* **17**, 3362-3377.
- Ji, J., Strable, J., Shimizu, R., Koenig, D., Sinha, N. and Scanlon, M. J. (2010). WOX4 promotes procambial development. *Plant Physiol.* **152**, 1346-1356.
- Leyser, H. M., Lincoln, C. A., Timpote, C., Lammer, D., Turner, J. and Estelle, M. (1993). *Arabidopsis* auxin-resistance gene AXR1 encodes a protein related to ubiquitin-activating enzyme E1. *Nature* **364**, 161-164.
- Li, Y., Rosso, M. G., Viehoveer, P. and Weisshaar, B. (2007). GABI-Kat SimpleSearch: an *Arabidopsis thaliana* T-DNA mutant database with detailed information for confirmed insertions. *Nucleic Acids Res.* **35**, D874-D878.
- Long, J. A., Ohno, C., Smith, Z. R. and Meyerowitz, E. M. (2006). TOPLESS regulates apical embryonic fate in *Arabidopsis*. *Science* **312**, 1520-1523.
- Marhavy, P., Bielach, A., Abas, L., Abuzeineh, A., Duclercq, J., Tanaka, H., Parezova, M., Petrasek, J., Friml, J., Kleine-Vehn, J. et al. (2011). Cytokinin modulates endocytic trafficking of PIN1 auxin efflux carrier to control plant organogenesis. *Dev. Cell* **21**, 796-804.
- Mattsson, J., Sung, Z. R. and Berleth, T. (1999). Responses of plant vascular systems to auxin transport inhibition. *Development* **126**, 2979-2991.
- McCallum, C. M., Comai, L., Greene, E. A. and Henikoff, S. (2000a). Targeted screening for induced mutations. *Nat. Biotechnol.* **18**, 455-457.
- McCallum, C. M., Comai, L., Greene, E. A. and Henikoff, S. (2000b). Targeting induced local lesions in genomes (TILLING) for plant functional genomics. *Plant Physiol.* **123**, 439-442.
- Mikkelsen, M., Dör, P. and Halkier, B. A. (2004). *Arabidopsis* mutants in the C-5 lyase of glucosinolate biosynthesis establish a critical role for indole-3-acetaldoxime in auxin homeostasis. *Plant J.* **37**, 770-777.
- Miyashima, S., Koi, S., Hashimoto, T. and Nakajima, K. (2011). Non-cell-autonomous microRNA165 acts in a dose-dependent manner to regulate multiple differentiation status in the *Arabidopsis* root. *Development* **138**, 2303-2313.
- Mravec, J., Kubes, M., Bielach, A., Gaykova, V., Petrasek, J., Skupa, P., Chand, S., Benkova, E., Zazimalova, E. and Friml, J. (2008). Interaction of PIN and PGP transport mechanisms in auxin distribution-dependent development. *Development* **135**, 3345-3354.
- Müller, B. and Sheen, J. (2008). Cytokinin and auxin interaction in root stem-cell specification during early embryogenesis. *Nature* **453**, 1094-1097.
- Nakamura, A., Higuchi, K., Goda, H., Fujiwara, M. T., Sawa, S., Koshiba, T., Shimada, Y. and Yoshida, S. (2003). Brassinolide induces IAA5, IAA19, and DR5, a synthetic auxin response element in *Arabidopsis*, implying a cross talk point of brassinosteroid and auxin signaling. *Plant Physiol.* **133**, 1843-1853.
- Nawy, T., Lukowitz, W. and Bayer, M. (2008). Talk global, act local: patterning the *Arabidopsis* embryo. *Curr. Opin. Plant Biol.* **11**, 28-33.
- Paponov, I. A., Paponov, M., Teale, W., Menges, M., Chakrabortee, S., Murray, J. A. H. and Palme, K. (2008). Comprehensive transcriptome analysis of auxin responses in *Arabidopsis*. *Mol. Plant* **1**, 321-337.
- Ploense, S. E., Wu, M. F., Nagpal, P. and Reed, J. W. (2009). A gain-of-function mutation in IAA18 alters *Arabidopsis* embryonic apical patterning. *Development* **136**, 1509-1517.
- Reinhardt, D. (2003). Vascular patterning: more than just auxin?. *Curr. Biol.* **13**, R485-R487.
- Sablowski, R. (2010). Plant stem cell niches: from signalling to execution. *Curr. Opin. Plant Biol.* **14**, 4-9.
- Sarkar, A. K., Luijten, M., Miyashima, S., Lenhard, M., Hashimoto, T., Nakajima, K., Scheres, B., Heidstra, R. and Laux, T. (2007). Conserved factors regulate signalling in *Arabidopsis thaliana* shoot and root stem cell organizers. *Nature* **446**, 811-814.
- Scarpella, E., Francis, P. and Berleth, T. (2004). Stage-specific markers define early steps of procambium development in *Arabidopsis* leaves and correlate termination of vein formation with mesophyll differentiation. *Development* **131**, 3445-3455.
- Scarpella, E., Marcos, D., Friml, J. and Berleth, T. (2006). Control of leaf vascular patterning by polar auxin transport. *Genes Dev.* **20**, 1015-1027.
- Scheres, B., Wolkenfelt, H., Willemsen, V., Terlouw, M., Lawson, E., Dean, C. and Weisbeek, P. (1994). Embryonic origin of the *Arabidopsis* primary root and root meristem initials. *Development* **120**, 2475-2487.
- Sieburth, L. (1999). Auxin is required for leaf vein pattern in *Arabidopsis*. *Plant Physiol.* **121**, 1179-1190.
- Sieburth, L. E., Muday, G. K., King, E. J., Benton, G., Kim, S., Metcalf, K. E., Meyers, L., Seamen, E. and Van Norman, J. M. (2006). SCARFACE encodes an ARF-GAP that is required for normal auxin efflux and vein patterning in *Arabidopsis*. *Plant Cell* **18**, 1396-1411.
- Smith, Z. and Long, J. (2010). Control of *Arabidopsis* apical-basal embryo polarity by antagonistic transcription factors. *Nature* **464**, 423-426.



- Song, S.-K., Hofhuis, H., Lee, M. M. and Clark, S. E. (2008). Key divisions in the early arabidopsis embryo require POL and PLL1 phosphatases to establish the root stem cell organizer and vascular axis. *Dev. Cell* **15**, 98-109.
- Stahl, Y. and Simon, R. (2010). Plant primary meristems: shared functions and regulatory mechanisms. *Curr. Opin. Plant Biol.* **13**, 53-58.
- Steinmann, T., Geldner, N., Grebe, M., Mangold, S., Jackson, C. L., Paris, S., Gälweiler, L., Palme, K. and Jürgens, G. (1999). Coordinated polar localization of auxin efflux carrier PIN1 by GNOM ARF GEF. *Science* **286**, 316-318.
- Suer, S., Agusti, J., Sanchez, P., Schwarz, M. and Greb, T. (2011). WOX4 imparts auxin responsiveness to cambium cells in Arabidopsis. *Plant Cell* **23**, 3247-3259.
- Sugano, S. S., Shimada, T., Imai, Y., Okawa, K., Tamai, A., Mori, M. and Hara-Nishimura, I. (2010). Stomagen positively regulates stomatal density in Arabidopsis. *Nature* **463**, 241-244.
- Till, B. J., Reynolds, S. H., Greene, E. A., Codomo, C. A., Enns, L. C., Johnson, J. E., Burtner, C., Odden, A. R., Young, K., Taylor, N. E. et al. (2003). Large-scale discovery of induced point mutations with high-throughput TILLING. *Genome Res.* **13**, 524-530.
- Van Norman, J. M. and Sieburth, L. E. (2007). Dissecting the biosynthetic pathway for the bypass1 root-derived signal. *Plant J.* **49**, 619-628.
- Van Norman, J. M., Frederick, R. L. and Sieburth, L. E. (2004). BYPASS1 negatively regulates a root-derived signal that controls plant architecture. *Curr. Biol.* **14**, 1739-1746.
- Van Norman, J. M., Breakfield, N. W. and Benfey, P. N. (2011a). Intercellular communication during plant development. *Plant Cell* **23**, 855-864.
- Van Norman, J. M., Murphy, C. and Sieburth, L. E. (2011b). BYPASS1: synthesis of the mobile root-derived signal requires active root growth and arrests early leaf development. *BMC Plant Biol.* **11**, 28.
- Weijers, D., Sauer, M., Meurette, O., Friml, J., Ljung, K., Sandberg, G., Hooykaas, P. and Offringa, R. (2005). Maintenance of embryonic auxin distribution for apical-basal patterning by PIN-FORMED-dependent auxin transport in Arabidopsis. *Plant Cell* **17**, 2517-2526.
- Weijers, D., Schlereth, A., Ehrismann, J. S., Schwank, G., Kientz, M. and Jürgens, G. (2006). Auxin triggers transient local signaling for cell specification in Arabidopsis embryogenesis. *Dev. Cell* **10**, 265-270.
- Wolters, H. and Jürgens, G. (2009). Survival of the flexible: hormonal growth control and adaptation in plant development. *Nat. Rev. Genet.* **10**, 305-317.
- Zhang, W., Murphy, C. and Sieburth, L. E. (2010). Conserved RNaseII domain protein functions in cytoplasmic mRNA decay and suppresses Arabidopsis decapping mutant phenotypes. *Proc. Natl. Acad. Sci. USA* **107**, 15981-15985.
- Zhang, W., To, J. P., Cheng, C. Y., Eric Schaller, G. and Kieber, J. J. (2011). Type-A response regulators are required for proper root apical meristem function through post-transcriptional regulation of PIN auxin efflux carriers. *Plant J.* **68**, 1-10.
